# Supplementary material
Source: PubMed Central journal article supplement (PMC6259317)
Supplement: Supplementary_Figure_1.pdf [file Supplementary_Figure_1.pdf]

## Supplemental Figure S1.

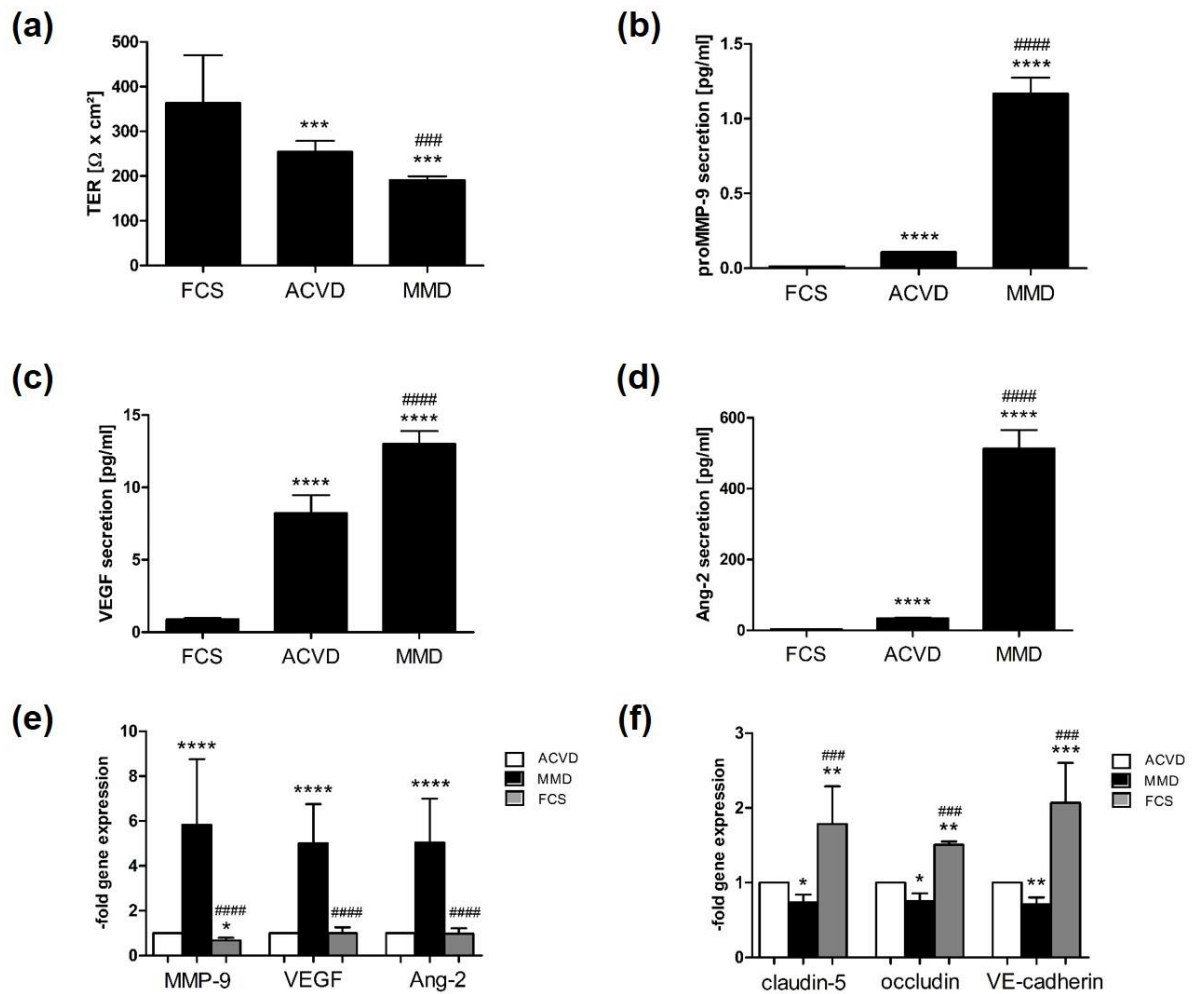

**Supplementary Figure S1.** Over 48 hours, cEND cells were exposed to pooled ACVD and MMD patient serum and compared with cells kept in 2% FCS (normal conditions) and TER **(A)** and the extracellular production of proMMP-9 **(B)**, VEGF **(C)** and Ang-2 **(D)** was tested by ELISA assays. Values in the graphs are means  $\pm$  SEM, (n=3 independent experiments performed in triplicates each including at least 5 different pooled patients' serum of each clinical type), \*\*\*\*/####  $P < 0.001$ , \*\*\*/###  $P < 0.005$  versus FCS-incubated cENDs, One-Way ANOVA. Relative gene expression of MMP-9, VEGF and Ang-2 **(E)**, as well as claudin-5, occludin and VE-cadherin **(F)** depicted as fold of ACVD-incubated cEND cells was tested after a 24-hour exposure to patients' serum and FCS. Values in the graphs are means  $\pm$  SEM, (n=3 independent experiments performed in triplicates each including at least 5 different pooled patients' serum of each clinical type) \*\*\*\*  $P < 0.001$ , \*\*  $P < 0.01$  versus ACVD-incubated cENDs, One-Way ANOVA.

Abbreviations: ACVD = atherosclerotic cerebrovascular disease; Ang-2 = angiotensin-2; ELISA = enzyme-linked immunosorbent assay; FCS = fetal calf serum; MMD = Moyamoya

disease; MMP-9 = matrix metalloproteinase-9; TER = transendothelial electrical resistance;  
VE-cadherin = vascular-endothelial cadherin; VEGF = vascular-aneothelial growth factor;
