# Supplementary material
Source: PubMed Central journal article supplement (PMC6259317)
Supplement: Supplementary_Figure_2.pdf [file Supplementary_Figure_2.pdf]

**Figure S2.**

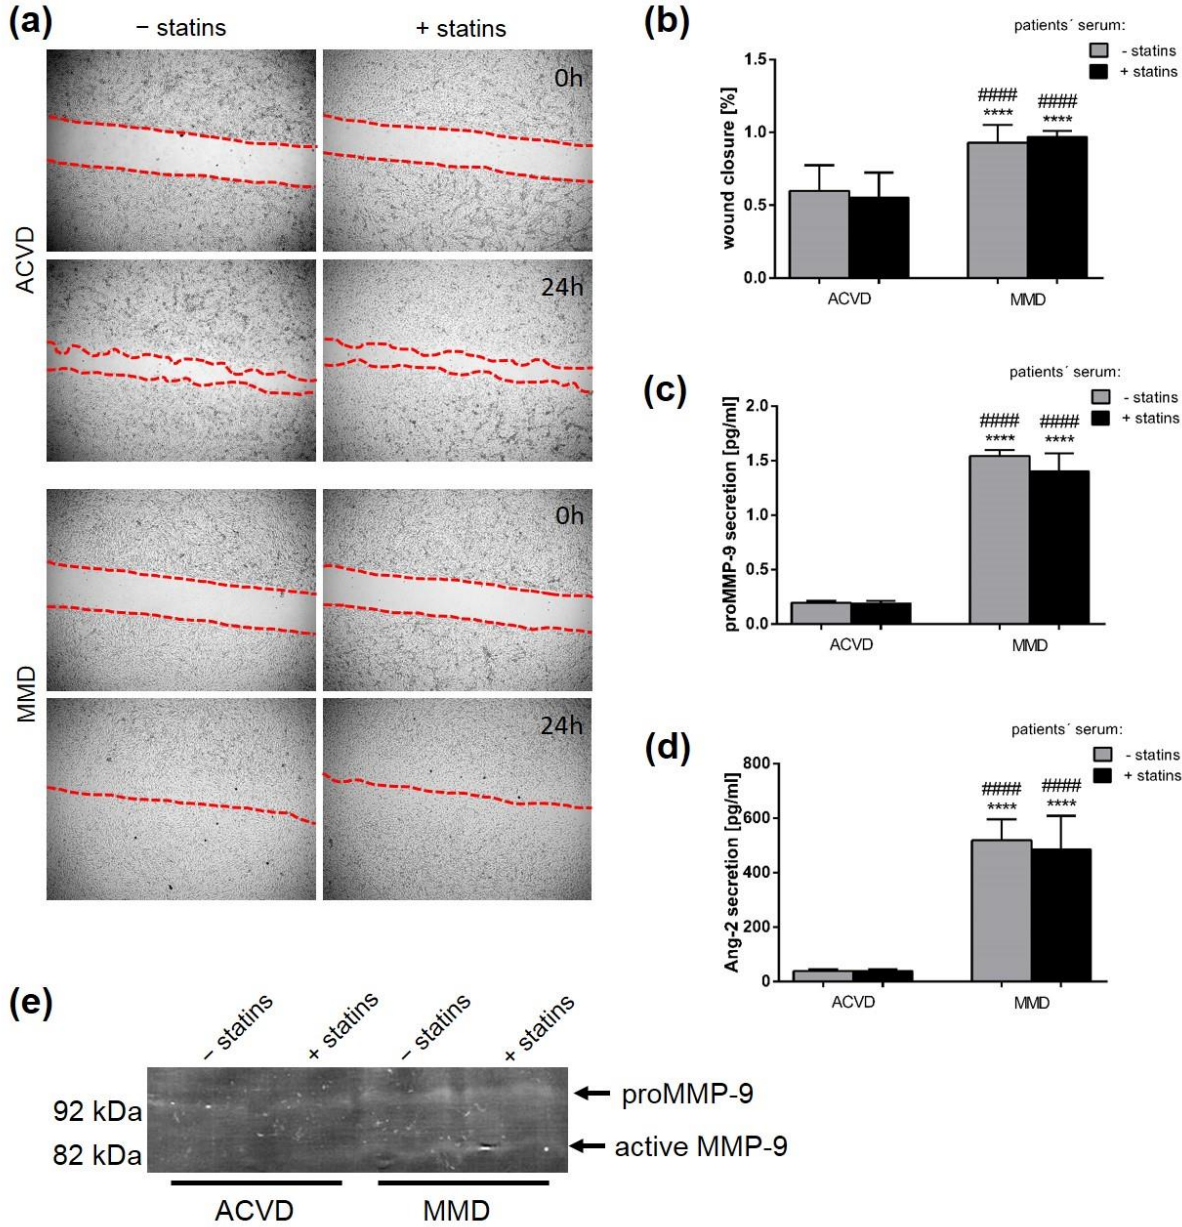

**Supplementary Figure S2.** CEND cells were kept in serum from patients with ACVD and MMD that have been indicated for statin intake (+ statins) or not (- statins), respectively. (n=3 independent experiments performed in duplicates). Brain EC migration and wound closure was analyzed by scratch assay and ImageJ (A and B). The secretion of proMMP-9 (C) and Ang-2 (D) into the extracellular compartment was tested by ELISA assays under ACVD versus MMD conditions with regard to statin intake. (n=3 independent experiments performed in triplicates) Gelatin zymography was assessed to test MMP-9 activity in cEND cell supernatants after incubation with ACVD or MMD serum and with respect to statin intake of the patients at admission (E). (n=4 independent experiments). Values in the graphs are means ± SEM,

\*\*\*\*/###  $P < 0.001$ , \*\*\*/###  $P < 0.005$  versus ACVD – statins or ACVD + statins serum-incubated cENDs, respectively; One-Way ANOVA.
